# Supplementary material for: Mechanochemical green synthesis of hyper-crosslinked cyclodextrin polymers
Source: publisher site journal article supplement (doi:10.3762/bjoc.16.127), 2020-06-29
Supplement: Additional file 1 [file 1860-5397-16-127-S1.pdf]

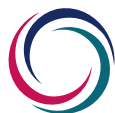

## Supporting Information

for

### **Mechanochemical green synthesis of hyper-crosslinked cyclodextrin polymers**

Alberto Rubin Pedrazzo, Fabrizio Caldera, Marco Zanetti, Silvia Lucia Appleton, Nilesh Kumar Dahkar and Francesco Trotta

*Beilstein J. Org. Chem.* **2020**, *16*, 1554–1563. [doi:10.3762/bjoc.16.127](https://doi.org/10.3762/bjoc.16.127)

## Additional experimental data

# Size distribution

Size distribution of  $\beta$ NSCDI 1:8 from ball-mill synthesis, after cycle of wet ball milling, was determined by dynamic light scattering (DLS). Then the data from DLS analysis were crossed with data from nanoparticle tracking analysis (NTA), for a more accurate dimensional distribution. In *Figure S1*, the results are reported.

## Particle Size

DLS  
Size Distribution by Intensity

NS-CDI 1:8

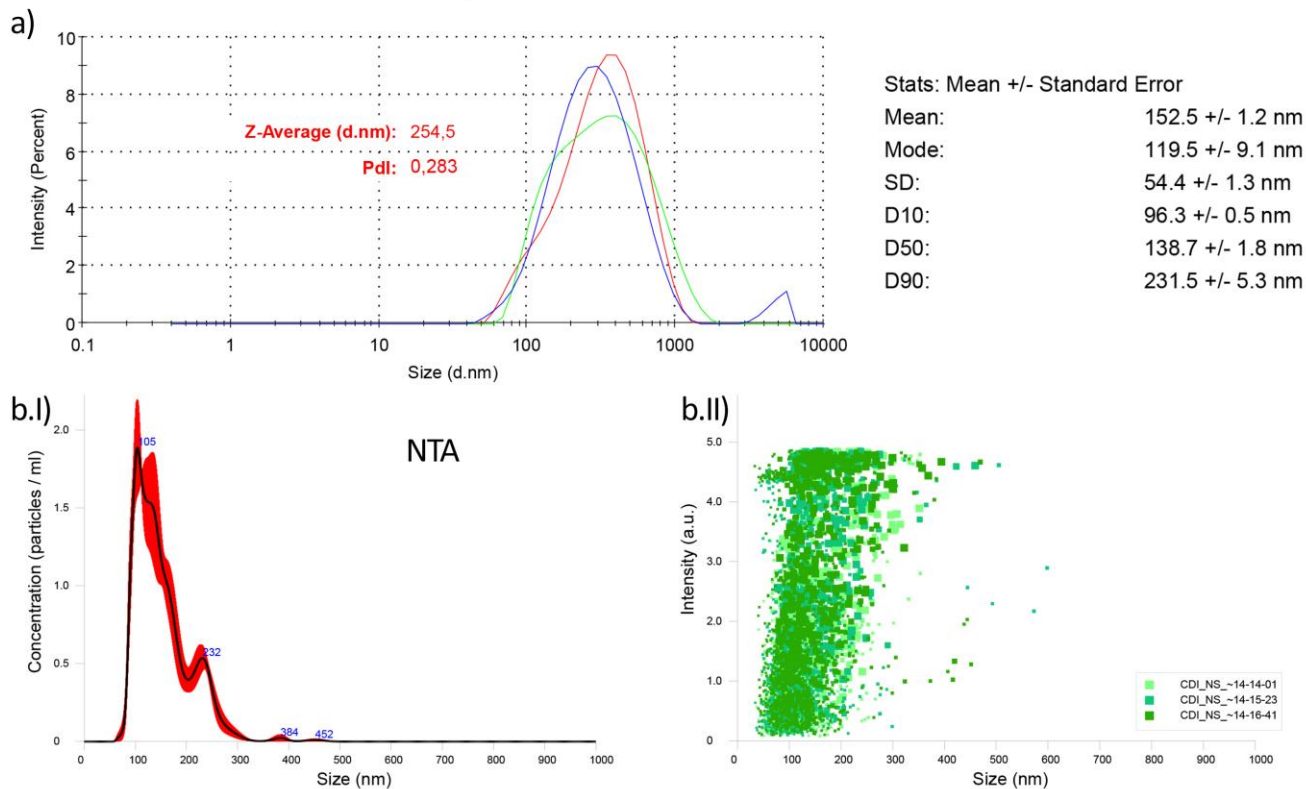

Figure S1: Size distribution of  $\beta$ NSCDI 1:8 from ball mill synthesis: a) DLS measurements b.I), b.II) distribution measurement via NTA.
